# Supplementary material for: Phytochemical Analysis, In Vitro Anticholinesterase, Antioxidant Activity and In Vivo Nootropic Effect of Ferula ammoniacum (Dorema ammoniacum) D. Don. in Scopolamine-Induced Memory Impairment in Mice
Source: PubMed Central journal article supplement (PMC7922987; doi:10.3390/brainsci11020259), 2021-02-19
Supplement: brainsci-11-00259-s001.pdf [file brainsci-11-00259-s001.pdf]

## Supplementary Material

**Table S1.** Percent AChE and BChE inhibition potential of *Ferula ammoniacum* (D. Don) seed extracts at various concentrations.

| S. No | Sample               | Concentration (µg/mL) | % AChE                     | AChE IC <sub>50</sub> (µg/mL) | % BChE                     | BChE IC <sub>50</sub> (µg/mL) |
|-------|----------------------|-----------------------|----------------------------|-------------------------------|----------------------------|-------------------------------|
|       |                      |                       | Mean ± SEM                 |                               | Mean ± SEM                 |                               |
| 1     | Fa.Met               | 1000                  | 66.51 ± 0.71***            | 80                            | 62.18 ± 0.96***            | 95                            |
|       |                      | 500                   | 60.32 ± 0.83***            |                               | 59.39 ± 1.19***            |                               |
|       |                      | 250                   | 55.48 ± 1.18***            |                               | 54.53 ± 1.15***            |                               |
|       |                      | 125                   | 50.45 ± 1.75***            |                               | 51.28 ± 0.40***            |                               |
|       |                      | 62.5                  | 47.32 ± 0.85**             |                               | 48.56 ± 1.16***            |                               |
|       |                      | 31.05                 | 45.67 ± 0.95*              |                               | 34.79 ± 0.60**             |                               |
| 2     | Fa.Hex               | 1000                  | 45.41 ± 1.15***            | 215                           | 50.08 ± 0.87***            | 205                           |
|       |                      | 500                   | 41.51 ± 1.09***            |                               | 45.64 ± 0.91***            |                               |
|       |                      | 250                   | 38.63 ± 0.84***            |                               | 40.22 ± 1.55***            |                               |
|       |                      | 125                   | 34.66 ± 0.69***            |                               | 37.26 ± 0.57***            |                               |
|       |                      | 62.5                  | 32.11 ± 1.16***            |                               | 32.52 ± 0.51***            |                               |
|       |                      | 31.05                 | 30.39 ± 1.42**             |                               | 29.33 ± 1.15***            |                               |
| 3     | Fa.Chf               | 1000                  | 88.44 ± 0.80*              | 43                            | 85.31 ± 0.49**             | 42                            |
|       |                      | 500                   | 84.93 ± 2.19**             |                               | 78.67 ± 1.26**             |                               |
|       |                      | 250                   | 78.94 ± 1.45**             |                               | 75.96 ± 0.73*              |                               |
|       |                      | 125                   | 67.36 ± 1.58**             |                               | 68.55 ± 1.12*              |                               |
|       |                      | 62.5                  | 58.84 ± 1.07**             |                               | 55.28 ± 0.77*              |                               |
|       |                      | 31.05                 | 43.08 ± 1.29*              |                               | 46.51 ± 0.59 <sup>ns</sup> |                               |
| 4     | Fa.EtAc              | 1000                  | 89.22 ± 1.74*              | 40                            | 86.37 ± 0.61**             | 41                            |
|       |                      | 500                   | 75.58 ± 1.54**             |                               | 78.65 ± 0.77**             |                               |
|       |                      | 250                   | 72.18 ± 1.08**             |                               | 74.71 ± 0.97**             |                               |
|       |                      | 125                   | 68.95 ± 0.86**             |                               | 62.64 ± 1.17**             |                               |
|       |                      | 62.5                  | 52.14 ± 1.04**             |                               | 58.44 ± 1.12*              |                               |
|       |                      | 31.05                 | 46.72 ± 1.15 <sup>ns</sup> |                               | 48.91 ± 0.98 <sup>ns</sup> |                               |
| 5     | Fa.Bn                | 1000                  | 35.03 ± 0.78***            | 330                           | 40.11 ± 0.67***            | 325                           |
|       |                      | 500                   | 30.66 ± 0.72***            |                               | 36.27 ± 0.49***            |                               |
|       |                      | 250                   | 29.28 ± 0.77***            |                               | 30.11 ± 1.15***            |                               |
|       |                      | 125                   | 21.33 ± 1.85***            |                               | 28.31 ± 1.22***            |                               |
|       |                      | 62.5                  | 19.46 ± 1.09***            |                               | 21.27 ± 0.64***            |                               |
|       |                      | 31.05                 | 11.29 ± 0.99***            |                               | 18.74 ± 1.15***            |                               |
| 6     | Fa.Aq                | 1000                  | 50.66 ± 1.50***            | 200                           | 55.66 ± 0.69***            | 195                           |
|       |                      | 500                   | 45.08 ± 1.32***            |                               | 50.36 ± 0.38***            |                               |
|       |                      | 250                   | 40.54 ± 1.10***            |                               | 47.80 ± 0.81 <sup>ns</sup> |                               |
|       |                      | 125                   | 38.48 ± 0.45***            |                               | 42.59 ± 0.71*              |                               |
|       |                      | 62.5                  | 36.01 ± 1.15***            |                               | 39.64 ± 0.84***            |                               |
|       |                      | 31.05                 | 30.31 ± 1.01***            |                               | 36.33 ± 0.57 <sup>ns</sup> |                               |
| 7     | Standard Galantamine | 1000                  | 96.56 ± 1.08               | 30                            | 95.17 ± 0.71               | 32                            |
|       |                      | 500                   | 91.90 ± 1.36               |                               | 88.44 ± 0.62               |                               |
|       |                      | 250                   | 87.78 ± 1.22               |                               | 80.73 ± 0.95               |                               |
|       |                      | 125                   | 75.11 ± 0.62               |                               | 71.64 ± 0.23               |                               |
|       |                      | 62.5                  | 67.59 ± 1.36               |                               | 66.38 ± 1.14               |                               |
|       |                      | 31.05                 | 49.11 ± 0.58               |                               | 50.52 ± 0.88               |                               |

Abbreviations: Fa, *Ferula ammoniacum*; AChE, Acetylcholine esterase; BChE, Butyrylcholine esterase; Fa. Met, Crude methanolic extract; Fa. Hex, *n*-hexane fraction; Fa. Chf, Chloroform fraction; Fa.EtAc, Ethyl acetate fraction; Fa. Bn, *n*-Butanol; Fa. Aq, Aqueous fraction

Note: The data is represented as mean ± SEM, (N = 3). Values are significantly different as compare to positive control Galantamine, \*P < 0.05, \*\*P < 0.01, \*\*\*P < 0.001.

**Table S2.** Percent DPPH and ABTS free radical scavenging activity of *Ferula ammoniacum* (D. Don) seed extracts at various concentrations.

| S. No | Sample        | Concentration (µg/mL) | % DPPH Scavenging | IC <sub>50</sub> (µg/mL) | % ABTS Scavenging         | IC <sub>50</sub> (µg/mL) |
|-------|---------------|-----------------------|-------------------|--------------------------|---------------------------|--------------------------|
|       |               |                       | Mean ± SEM        |                          | Mean ± SEM                |                          |
| 1     | Fa.Met        | 1000                  | 71.91 ± 0.55***   | 140                      | 58.48 ± 0.96***           | 250                      |
|       |               | 500                   | 62.01 ± 0.56***   |                          | 50.26 ± 0.62***           |                          |
|       |               | 250                   | 42.49 ± 0.44***   |                          | 32.71 ± 0.87***           |                          |
|       |               | 125                   | 40.75 ± 0.88***   |                          | 27.44 ± 0.85***           |                          |
|       |               | 62.5                  | 36.22 ± 0.61***   |                          | 16.55 ± 0.81***           |                          |
|       |               | 31.05                 | 32.47 ± 0.65**    |                          | 14.30 ± 0.35***           |                          |
| 2     | Fa.Hex        | 1000                  | 34.58 ± 0.90***   | 920                      | 36.04 ± 0.57***           | 910                      |
|       |               | 500                   | 30.22 ± 0.61***   |                          | 34.32 ± 0.87***           |                          |
|       |               | 250                   | 28.09 ± 0.59***   |                          | 31.10 ± 0.53***           |                          |
|       |               | 125                   | 24.64 ± 0.86***   |                          | 29.35 ± 0.32***           |                          |
|       |               | 62.5                  | 19.97 ± 0.55***   |                          | 23.95 ± 1.02***           |                          |
|       |               | 31.05                 | 15.84 ± 0.89***   |                          | 17.11 ± 0.49***           |                          |
| 3     | Fa.Chf        | 1000                  | 73.23 ± 1.55***   | 120                      | 66.19 ± 0.60***           | 210                      |
|       |               | 500                   | 66.88 ± 0.59***   |                          | 60.35 ± 0.63***           |                          |
|       |               | 250                   | 60.81 ± 0.69***   |                          | 54.22 ± 0.59**            |                          |
|       |               | 125                   | 52.98 ± 1.14***   |                          | 50.72 ± 0.64**            |                          |
|       |               | 62.5                  | 49.89 ± 0.45***   |                          | 47.12 ± 0.47*             |                          |
|       |               | 31.05                 | 45.25 ± 0.60***   |                          | 43.71 ± 1.18 <sup>n</sup> |                          |
| 4     | Fa.EtAc       | 1000                  | 81.86 ± 0.59**    | 100                      | 75.08±0.57***             | 120                      |
|       |               | 500                   | 73.49 ± 0.84**    |                          | 62.29±0.66***             |                          |
|       |               | 250                   | 62.30 ± 1.30***   |                          | 59.31±0.74**              |                          |
|       |               | 125                   | 52.60 ± 0.93**    |                          | 54.45±0.88**              |                          |
|       |               | 62.5                  | 44.48 ± 1.27**    |                          | 50.04±1.51*               |                          |
|       |               | 31.05                 | 32.27 ± 1.08*     |                          | 45.38±0.86*               |                          |
| 5     | Fa.Bn         | 1000                  | 36.57 ± 0.91***   | 910                      | 44.73 ± 0.79***           | 870                      |
|       |               | 500                   | 33.65 ± 0.71***   |                          | 40.57 ± 0.55***           |                          |
|       |               | 250                   | 29.29 ± 0.64***   |                          | 36.09 ± 0.58***           |                          |
|       |               | 125                   | 23.62 ± 1.18***   |                          | 31.22 ± 1.17***           |                          |
|       |               | 62.5                  | 20.55 ± 0.66***   |                          | 27.81 ± 0.83***           |                          |
|       |               | 31.05                 | 18.07 ± 1.48 *    |                          | 21.54 ± 1.08**            |                          |
| 6     | Fa.Aq         | 1000                  | 39.83 ± 1.15***   | 900                      | 47.73 ± 0.91***           | 860                      |
|       |               | 500                   | 35.46 ± 0.86***   |                          | 44.09 ± 0.88***           |                          |
|       |               | 250                   | 31.91 ± 1.06***   |                          | 30.68 ± 0.80***           |                          |
|       |               | 125                   | 28.51 ± 0.84***   |                          | 38.62 ± 0.74***           |                          |
|       |               | 62.5                  | 24.78 ± 0.66***   |                          | 32.07 ± 0.49***           |                          |
|       |               | 31.05                 | 20.76 ± 0.62**    |                          | 29.82 ± 1.17**            |                          |
| 7     | Ascorbic acid | 1000                  | 91.32 ± 0.34      | 30                       | 95.31 ± 0.75              | 45                       |
|       |               | 500                   | 87.26 ± 0.59      |                          | 82.79 ± 1.10              |                          |
|       |               | 250                   | 80.19 ± 1.15      |                          | 77.33 ± 0.67              |                          |
|       |               | 125                   | 67.98 ± 1.14      |                          | 62.92 ± 0.81              |                          |
|       |               | 62.5                  | 54.90 ± 1.01      |                          | 53.55 ± 1.01              |                          |
|       |               | 31.05                 | 27.54 ± 0.84      |                          | 43.64 ± 0.69              |                          |

Abbreviations: Fa, *Ferula ammoniacum*; Fa.Met, Crude methanolic extract; Fa. Hex, *n*-hexane fraction; Fa.Cf, Chloroform fraction; Fa.EtAc, Ethyl acetate fraction; Fa.Bn, *n*-Butanol; Fa. Aq, Aqueous fraction.

The data is represented as mean ± SEM, (N = 3). Values are significantly different as compare to positive control Ascorbic acid, \*P < 0.05, \*\*P < 0.01, \*\*\*P < 0.001.

**Table S3.** Nootropic effect of *Ferula ammoniacum* (D. Don) seeds extracts in Novel Object Recognition Test.

| Treatments                       | Exploration time (seconds) |                        |                         | Discrimination index | Percent Discrimination index |
|----------------------------------|----------------------------|------------------------|-------------------------|----------------------|------------------------------|
|                                  | Session 1                  | Session 2              |                         |                      |                              |
|                                  |                            | N                      | F                       |                      |                              |
| DW+Sal <sup>a</sup>              | 39.2                       | 36.0±2.1               | 11.00±1.1               | 0.53                 | 53                           |
| DW+Scop <sup>b</sup>             | 20.4                       | 25.0±1.6***            | 18.00±2.4***            | 0.16***              | 16                           |
| Fa.EtAc<br>50+Scop <sup>c</sup>  | 26.9                       | 36.5±2.2 <sup>#</sup>  | 15.10±2.5 <sup>##</sup> | 0.41 <sup>##</sup>   | 41                           |
| Fa.EtAc<br>100+Scop <sup>c</sup> | 27.5                       | 37.3±3.5 <sup>#</sup>  | 14.20±3.1 <sup>#</sup>  | 0.45 <sup>##</sup>   | 45                           |
| Fa.EtAc<br>200+Scop <sup>c</sup> | 31.5                       | 38.5±2.2 <sup>#</sup>  | 12.40±2.3 <sup>#</sup>  | 0.51 <sup>#</sup>    | 51                           |
| DZP+Scop <sup>c</sup>            | 34.2                       | 34.2±1.2 <sup>##</sup> | 11.30±1.5 <sup>#</sup>  | 0.50 <sup>#</sup>    | 50                           |

Abbreviations: Fa, *Ferula ammoniacum*; Fa.EtAc, Ethyl acetate fraction. [The data is expressed as Mean ± SEM, Each value corresponds to a mean of eight animals. One way ANOVA followed by Dunnett's *post hoc* multiple comparison test to determine the values of P. \*\*\*p < 0.001; comparison of DW+Sal<sup>a</sup> (Normal control) vs DW+Scop<sup>b</sup> (Scopolamine treated group), #p < 0.05 and ##p < 0.01; comparison of (DW+Scop)<sup>b</sup> vs DZP+Scop<sup>c</sup> (Donepezil treated) and Fa.EtAc<sup>c</sup> (50, 100 and 200 mg/kg) treated groups using one way ANOVA followed by Dunnett's *post hoc* multiple comparison test].
